# Supplementary material
Source: PubMed Central journal article supplement (PMC6182105)
Supplement: supp_6.3.E339_2018-0023-1-at.pdf [file supp_6.3.E339_2018-0023-1-at.pdf]

**Appendix 1 (as supplied by the authors): Ovid MEDLINE(R) Epub Ahead of Print, In-Process & Other Non-Indexed Citations, Ovid MEDLINE(R) Daily and Ovid MEDLINE(R)**

|                                                                                                                                                                                                                                                                                                                                                                                                                                                                                                                                                                                                                                                                                                                                                                                                                 |         |
|-----------------------------------------------------------------------------------------------------------------------------------------------------------------------------------------------------------------------------------------------------------------------------------------------------------------------------------------------------------------------------------------------------------------------------------------------------------------------------------------------------------------------------------------------------------------------------------------------------------------------------------------------------------------------------------------------------------------------------------------------------------------------------------------------------------------|---------|
| 1. Cannabis/ae, de, pd, po, to [Adverse Effects, Drug Effects, Pharmacology, Poisoning, Toxicity]                                                                                                                                                                                                                                                                                                                                                                                                                                                                                                                                                                                                                                                                                                               | 2,269   |
| 2. exp Marijuana Abuse/                                                                                                                                                                                                                                                                                                                                                                                                                                                                                                                                                                                                                                                                                                                                                                                         | 5,592   |
| 3. ((bhang or bhangs or bhangstar or cannabutter or cannabis* or doobie* or ganga or gangas or ganja or ganjas or grass or hash* or hashish* or hemp or hemsps or honeycomb or mary jane* or marihuana* or marijuana* or moon rock or pot or reefer* or roach* or shatter or weed) adj10 (abus* or addiction* or addictive* or adverse event* or adverse reaction* or behavioral or behavioural or blood pressure or cancer* or (behavior adj1 chang*) or (behaviour adj1 chang*) or cogniti* or death* or dependenc* or depressi* or (drug* adj3 interact*) or effect or effects or harm or harms or impact or impacts or impair* or intoxicat* or lung or lungs or mania or morbidit* or mortalit* or overdos* or poison* or psycho* or pulmonary or respiratory or risks or safety or suicid* or toxic*).tw. | 15,351  |
| 4. 1 or 2 or 3                                                                                                                                                                                                                                                                                                                                                                                                                                                                                                                                                                                                                                                                                                                                                                                                  | 19,279  |
| 5. limit 4 to (english or french)                                                                                                                                                                                                                                                                                                                                                                                                                                                                                                                                                                                                                                                                                                                                                                               | 18,044  |
| 6. limit 5 to (case reports or comment or editorial or letter)                                                                                                                                                                                                                                                                                                                                                                                                                                                                                                                                                                                                                                                                                                                                                  | 1,390   |
| 7. 5 not 6                                                                                                                                                                                                                                                                                                                                                                                                                                                                                                                                                                                                                                                                                                                                                                                                      | 16,654  |
| 8. limit 7 to systematic reviews                                                                                                                                                                                                                                                                                                                                                                                                                                                                                                                                                                                                                                                                                                                                                                                | 451     |
| 9. ((systematic or critical or scoping) adj3 (overview* or review* or synthesis)).tw.                                                                                                                                                                                                                                                                                                                                                                                                                                                                                                                                                                                                                                                                                                                           | 148,423 |
| 10. 7 and 9                                                                                                                                                                                                                                                                                                                                                                                                                                                                                                                                                                                                                                                                                                                                                                                                     | 237     |
| 11. limit 7 to meta analysis                                                                                                                                                                                                                                                                                                                                                                                                                                                                                                                                                                                                                                                                                                                                                                                    | 123     |
| 12. 8 or 10 or 11                                                                                                                                                                                                                                                                                                                                                                                                                                                                                                                                                                                                                                                                                                                                                                                               | 470     |
